CORRECTION

# Correction: Targeted modulation of MMP9 and GRP78 via molecular interaction and *in silico* profiling of *Curcuma caesia* rhizome metabolites: A computational drug discovery approach for cancer therapy

Mahek Desai, Soham Bhattacharya, Saurabhkumar Mehta, Kaushiki Joshi, Mitesh B. Solanki, Trilok Akhani, Iva Viehmannová, Eloy Fernández Cusimamani

There are errors in the Funding statement. The correct Funding statement is as follows: This work was financially supported by the Internal Grant Agency of the Faculty of Tropical AgriSciences, Czech University of Life Sciences Prague, IGA (Project No. 20253135 and 20253126).

## Reference

1. Desai M, Bhattacharya S, Mehta S, Joshi K, Solanki MB, Akhani T, et al. Targeted modulation of MMP9 and GRP78 via molecular interaction and *in silico* profiling of *Curcuma caesia* rhizome metabolites: A computational drug discovery approach for cancer therapy. PLoS One. 2025;20(7):e0328509. <https://doi.org/10.1371/journal.pone.0328509> PMID: 40679956

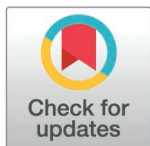

## OPEN ACCESS

**Citation:** Desai M, Bhattacharya S, Mehta S, Joshi K, Solanki MB, Akhani T, et al. (2025) Correction: Targeted modulation of MMP9 and GRP78 via molecular interaction and *in silico* profiling of *Curcuma caesia* rhizome metabolites: A computational drug discovery approach for cancer therapy. PLoS One 20(12): e0339069. <https://doi.org/10.1371/journal.pone.0339069>

**Published:** December 15, 2025

**Copyright:** © 2025 Desai et al. This is an open access article distributed under the terms of the [Creative Commons Attribution License](https://creativecommons.org/licenses/by/4.0/), which permits unrestricted use, distribution, and reproduction in any medium, provided the original author and source are credited.
